# Supplementary material for: IL-27 inhibits HIV-1 infection in human macrophages by down-regulating host factor SPTBN1 during monocyte to macrophage differentiation
Source: PubMed Central journal article supplement — J Exp Med. 2013 Mar 11;210(3):517–34. doi: 10.1084/jem.20120572 (PMC3600911; doi:10.1084/jem.20120572), 2013-03-11
Supplement: supp_jem.20120572_JEM_20120572_sm.pdf [file supp_jem.20120572_JEM_20120572_sm.pdf]

SUPPLEMENTAL MATERIAL

Dai et al., <http://www.jem.org/cgi/content/full/jem.20120572/DC1>

**Table S1.** Differential gene expression profile of I-Mac

| FC > 5.0             | Gene list                                                                                                                                                                                                                                                                                                                                                                                                                                                                                                                                                                                                                                                                                                                                                                                                                                                                                    |
|----------------------|----------------------------------------------------------------------------------------------------------------------------------------------------------------------------------------------------------------------------------------------------------------------------------------------------------------------------------------------------------------------------------------------------------------------------------------------------------------------------------------------------------------------------------------------------------------------------------------------------------------------------------------------------------------------------------------------------------------------------------------------------------------------------------------------------------------------------------------------------------------------------------------------|
| Down-regulated group | FABP4, LPL, GPC4, AQP9, ITGA3, CNIH3, ATP6V0D2, SPARC, SLC7A8, FAIM3, CHIT1, TIMP3, TM7SF4, NCAPH, TDRD9, SPP1, HPGD, SDC2, CD109, MMP8, EPAS1, GALNT12, C13orf15, NRIP3, PGDS, UCHL1, ST14, TMEM16E, FBP1, MGST1, TM4SF19, SERPINE1, GPD1, ADRA2B, PHLDA1, FARP1, PDE3B, RNF128, TDRD3, ITGA6, FHL1, ATP2B4, ITPKB, TBC1D8, SPTBN1, CD52, LSP1, TMEM91, CD300LB, EPS8, TREM2, TGM2, GPRIN3, ZNF366, ITGB5, HSPC159, ADCY3, ST6GALNAC6, PPARG, OLR1.                                                                                                                                                                                                                                                                                                                                                                                                                                         |
| Up-regulated group   | IFIT2, HSPA6, CD40, RNASE2, FLJ20035, PDE4B, IFIT5, STX11, OAS2, BTN2A2, PSMB10, ALOX5AP, IFI44, CD226, NFKBIZ, S100A9, FPR1, PLSCR1, JAK2, RHOBTB3, TMEM176A, CD300E, PSMB8, DYSF, FCN1, ECGF1, PRKAR2B, GBP3, LILRB5, EMR1, GIMAP8, ABI3, LAP3, MCOLN2, FCGR3A, IFITM1, IFI35, IFIT3, PSTPIP2, LILRB1, TNFSF13B, SERPINA1, ADAMDEC1, HLA-F, ME1, BTN3A3, IL1B, SEMA4A, LILRA3, CCL4, BTN3A2, CD209, KCNJ2, TNF, P2RY6, STAT1, SAMD9L, SERPINB9, MX1, OAS3, C1QA, GBP2, GPR141, GPR84, PSMB9, APOL6, GIMAP1, HLA-DOA, TAP1, CD80, PSME2, TAP2, GRIN3A, TIFA, CFB, SECTM1, IL32, CASP5, CLEC4E, MT1H, HCP5, PDCD1LG2, GCH1, APOL4, GIMAP7, CXCL1, C1QC, GIMAP6, TNFAIP6, GIMAP4, APOL1, TNFSF10, S100A8, EPSTI1, IRF1, VAMP5, CD274, GBP1, CXCL11, INDO, RSAD2, APOL3, MT1G, C1QB, GIMAP5, IFI44L, CD38, IFI27, SERPING1, LGALS3BP, FPRL1, CXCL10, GBP4, RARRES3, ANKRD22, CXCL9, GBP5, CCL8 |
